# Supplementary material for: Oseltamivir Resistance during Treatment of Influenza A (H5N1) Infection
Source: Atypon-hosted journal article supplement (doi:10.1056/nejmoa054512), 2005-12-21
Supplement: nejm_dejong_2667sa1.pdf [file nejm_dejong_2667sa1.pdf]

## Supplementary Appendix

This appendix has been provided by the authors to give readers additional information about their work.

Supplement to: de Jong MD, Thanh TT, Khanh TH, et al. Oseltamivir resistance during treatment of influenza A (H5N1) infection. *N Engl J Med* 2005;353:2667-72.

**Supplementary appendix***GenBank accession numbers of N1 sequences of influenza H5N1 isolates*

| <b>Patient</b> | <b>Virus isolate</b>  | <b>Accession number</b> |
|----------------|-----------------------|-------------------------|
| 1              | A/Vietnam/CL2009/2005 | DQ250165                |
| 2              | A/Vietnam/CL119/2005  | DQ250164                |
| 3              | A/Vietnam/CL100/2004  | DQ250162                |
| 5              | A/Vietnam/CL115/2005  | DQ250163                |
| 6              | A/Vietnam/CL01/2004   | DQ250159                |
| 7              | A/Vietnam/CL26/2004   | DQ250160                |
| 8              | A/Vietnam/CL36/2004   | DQ250161                |

### Clinical characteristics and laboratory values on admission

| Variable                                     | Patients       |         |         |                  |        |                |                |        |
|----------------------------------------------|----------------|---------|---------|------------------|--------|----------------|----------------|--------|
|                                              | 1              | 2       | 3       | 4                | 5      | 6 <sup>a</sup> | 7 <sup>a</sup> | 8      |
| <b>Clinical</b>                              |                |         |         |                  |        |                |                |        |
| Illness day at onset                         | 2              | 6       | 7       | 6                | 4      | 8              | 7              | 6      |
| Sex                                          | Female         | Female  | Female  | Female           | Female | Female         | Male           | Male   |
| Age (yr)                                     | 13             | 35      | 16      | 18               | 26     | 8              | 23             | 22     |
| Cough                                        | Yes            | Yes     | Yes     | Yes              | Yes    | Yes            | Yes            | Yes    |
| Dyspnea                                      | Yes            | Yes     | Yes     | Yes              | Yes    | Yes            | Yes            | Yes    |
| Sputum                                       | No             | Yes     | No      | Yes              | Yes    | Yes            | Yes            | No     |
| Diarrhea                                     | No             | No      | No      | Yes              | No     | Yes            | Yes            | No     |
| Temperature (°C)                             | 40.3           | 38.5    | 39.7    | 39               | 40     | 38.5           | 38.7           | 40.2   |
| Respiratory rate (breaths/min)               | 36             | 48      | 60      | 40               | 32     | 40             | 28             | 46     |
| Blood pressure (mm Hg)                       | 110/60         | 60/40   | 110/60  | 120/60           | 110/60 | 104/64         | 120/80         | 120/60 |
| Pulse (beats/min)                            | 106            | 110     | 140     | 120              | 120    | 110            | 130            | 120    |
| <b>Hematology</b>                            |                |         |         |                  |        |                |                |        |
| Leucocyte count (cells per mm <sup>3</sup> ) | 4800           | 567     | 2040    | 4820             | 2430   | 1200           | 2100           | 2630   |
| Lymphocytes (%)                              | 12             | 23      | 29      | 18               | 18     | 31             | 18             | 21     |
| Neutrophils (%)                              | 80             | 71      | 51      | 79               | 78     | 55             | 79             | 75     |
| Platelet count (cells per mm <sup>3</sup> )  | 183,000        | 137,000 | 105,000 | 98,500           | 80,300 | 117,000        | 102,000        | 78,400 |
| <b>Blood chemistry</b>                       |                |         |         |                  |        |                |                |        |
| AST (U/liter)                                | 45             | 534     | 426     | 100              | 39     | 320            | 110            | 58     |
| ALT (U/liter)                                | 20             | 467     | 201     | 60               | 21     | 354            | 89             | 42     |
| <b>Arterial Blood</b>                        |                |         |         |                  |        |                |                |        |
| pH                                           | NA             | 7.45    | 7.42    | 7.46             | NA     | NA             | 7.43           | 7.45   |
| pO <sub>2</sub> (mm Hg)                      | NA             | 36      | 27      | 63               | NA     | NA             | 75             | 56     |
| pCO <sub>2</sub> (mm Hg)                     | NA             | 42      | 38      | 34               | NA     | NA             | 31             | 31     |
| Bicarbonate (mEq/liter)                      | NA             | 24      | 24      | 23               | NA     | NA             | 20             | 20     |
| Saturation (%)                               | NA             | 45      | 51      | NA               | NA     | 95             | 90             | 88     |
| <b>Microbiology</b>                          |                |         |         |                  |        |                |                |        |
| Blood culture                                | -              | -       | -       | -                | -      | -              | -              | -      |
| H5N1 RT-PCR                                  | + <sup>b</sup> | +       | +       | +                | +      | +              | +              | +      |
| H5N1 culture                                 | NA             | +       | +       | -                | +      | +              | +              | +      |
| NA 274 residue                               | NA             | His     | His     | His <sup>c</sup> | His    | His            | His            | His    |

<sup>a</sup> Patients 6 and 7 are identical to patients 5 and 10 in reference 2 (Tran TH *et al.* Avian influenza A (H5N1) infection in 10 patients in Vietnam. N Engl J Med 2004; 350: 1179-88); <sup>b</sup> Performed at a different laboratory; <sup>c</sup> Sequence of viral RNA extracted directly from pharyngeal swab. Normal ranges are as follows: leukocyte count, 5,500 to 15,500 per cubic millimeter; % neutrophils, 23 to 45; % lymphocytes, 35 to 65; platelet count, 250,000 to 550,000 per cubic millimeter; alanine aminotransferase (ALT) level, below 55 U per liter; aspartate aminotransferase (AST) level, below 50 U per liter; arterial blood pH, 7.35 to 7.45; arterial oxygen pressure (pO<sub>2</sub>), 70 to 100 mm Hg; arterial carbon dioxide pressure (pCO<sub>2</sub>), 35 to 45 mm Hg; arterial bicarbonate level, 19 to 25 mEq per liter. NA denotes not available, a plus sign positive, and a minus sign negative.

## Summary of clinical courses

| <i>patient</i> | <i>Summary of clinical course</i>                                                                                                                                                                                                                                                                                                                                                                                                                                                                                                                                                                                                                                                                                                                                                                                                                                                             |
|----------------|-----------------------------------------------------------------------------------------------------------------------------------------------------------------------------------------------------------------------------------------------------------------------------------------------------------------------------------------------------------------------------------------------------------------------------------------------------------------------------------------------------------------------------------------------------------------------------------------------------------------------------------------------------------------------------------------------------------------------------------------------------------------------------------------------------------------------------------------------------------------------------------------------|
| 1              | See case report in main text.                                                                                                                                                                                                                                                                                                                                                                                                                                                                                                                                                                                                                                                                                                                                                                                                                                                                 |
| 2              | Patient was admitted in the evening of 20 January 2005 with shock, respiratory failure, and bilateral pneumonia. On admission, she was intubated and ventilated, and treatment was started with oseltamivir, ceftriaxone and azithromycin. She died the next day shortly after receiving the second dose of oseltamivir.                                                                                                                                                                                                                                                                                                                                                                                                                                                                                                                                                                      |
| 3              | Patient was admitted on 26 December 2004 with respiratory failure and bilateral pneumonia. On admission, she was intubated and ventilated, and treatment was started with oseltamivir, ceftriaxone and amikacin. On 3 January 2005, she developed high fever and peripheral leucocytosis (leucocyte count 21,800 cells per cubic millimeter with 90% neutrophils). Bacterial suprainfection was suspected, and antibiotics were switched to imipenem, gatifloxacin and vancomycin. Despite this, the clinical and respiratory condition continued to worsen, and she died 5 days later on 8 January. Bacteriological investigations on the day before her death revealed <i>Stenotrophomonas maltophilia</i> from broncho-alveolar lavage fluid.                                                                                                                                              |
| 4              | Patient was admitted on 5 January 2005 with bilateral pneumonia. On admission, treatment was started with oseltamivir, ceftriaxone and azithromycin. Supplemental oxygen was given by nasal cannula during the first 3 days of admission, but on the fourth day of admission she was intubated and ventilated because of progressive respiratory failure. On the 9 <sup>th</sup> day of admission (13 January, the day that resistant H5N1 virus was isolated from her throat), her temperature rose and her leucocyte count had increased to 18,000 cells per cubic millimeter with 90% neutrophils. Antibiotics were switched to imipenem and gatifloxacin but her respiratory and clinical condition continued to deteriorate. Bacterial culture of broncho-alveolar lavage fluid obtained 3 days later was negative. She died on the 15 <sup>th</sup> day of admission (19 January 2005). |
| 5              | Patient was admitted on 18 January 2005 with right-sided pneumonia. On admission, treatment was started with oseltamivir, ceftriaxone and azithromycin. She did not require supplemental oxygen. The patient's temperature normalized within 3 days, and her respiratory condition improved gradually. She was discharged after 10 days on January 28.                                                                                                                                                                                                                                                                                                                                                                                                                                                                                                                                        |
| 6              | Patient was admitted on 23 January 2004 with right-sided pneumonia. On admission, treatment was started with oseltamivir, ceftriaxone, amikacin, and vancomycin. She received supplemental oxygen by continuous positive airway pressure, which could be discontinued after 6 days. Antibiotic treatment was stopped after 14 days. She was discharged on 17 February 2004.                                                                                                                                                                                                                                                                                                                                                                                                                                                                                                                   |
| 7              | Patient was admitted on 3 February 2004 with bilateral pneumonia. On admission, treatment was started with oseltamivir, ceftriaxone and amikacin. Supplemental oxygen was given by nasal cannula. The patient's clinical condition improved gradually. Antibiotic treatment was stopped after 13 days, and supplemental oxygen could be discontinued after 15 days. The patient was discharged on 1 March 2004.                                                                                                                                                                                                                                                                                                                                                                                                                                                                               |
| 8              | Patient was admitted on 6 February 2004 with left-sided pneumonia. On admission, treatment was started with oseltamivir, ceftriaxone and vancomycin. Supplemental oxygen was given by oxygen mask. After 6 days, antibiotics were switched to imipenem and vancomycin because of increasing fever. Bacterial cultures of blood and sputum obtained on the same day were negative. The patient's clinical condition slowly improved but on 27 February he developed recurrent left-sided pneumothoraces. On 15 March, he was transferred to a pulmonary referral hospital for further management of pneumothorax. He was discharged from this hospital one month later.                                                                                                                                                                                                                        |
